# Supplementary material for: Bi3+/Sm3+ co-doped LiTaO3 photochromic perovskites: an ultrafast erasable optical information storage medium
Source: Royal Society of Chemistry journal article supplement (doi:10.1039/d3qi00956d), 2023-01-01
Supplement: d3qi00956d1.pdf [file d3qi00956d1.pdf]

# Bi<sup>3+</sup>/Sm<sup>3+</sup> co-doped LiTaO<sub>3</sub> photochromic perovskites: An ultrafast erasable optical information storage medium

Ruiting Zhang<sup>a</sup>, Yahong Jin,<sup>a,\*</sup> Yanmei Li,<sup>b,\*</sup> Haoyi Wu,<sup>a</sup> Yihua Hu<sup>a,\*</sup>

<sup>a</sup>School of Physics and Optoelectronic Engineering, Guangdong University of Technology, WaiHuan Xi Road, No. 100, Guangzhou, Guangdong, 510006, China

E-mail: yhj@gdut.edu.cn (Y. Jin); huyh@gdut.edu.cn (Y. Hu)

<sup>b</sup>School of Electronics and Electrical Engineering, Zhaoqing University, Yingbin Avenue, Duanzhou District, Zhaoqing, Guangdong, 526061, China

E-mail: 2010020017@zqu.edu.cn

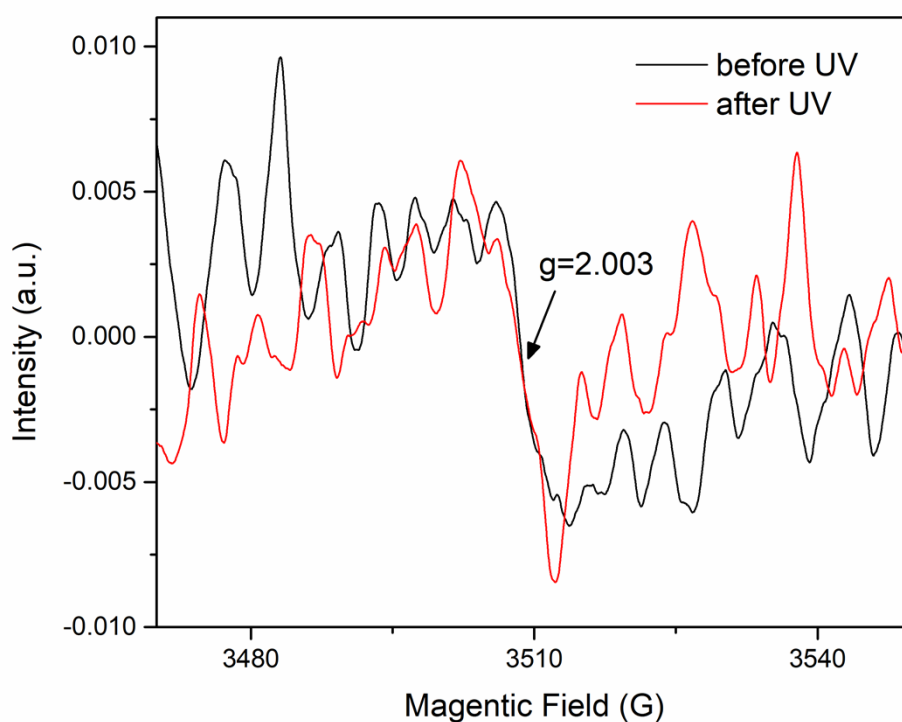

**Figure S1.** EPR spectra of LiTaO<sub>3</sub> samples before and after 254 nm light irradiation

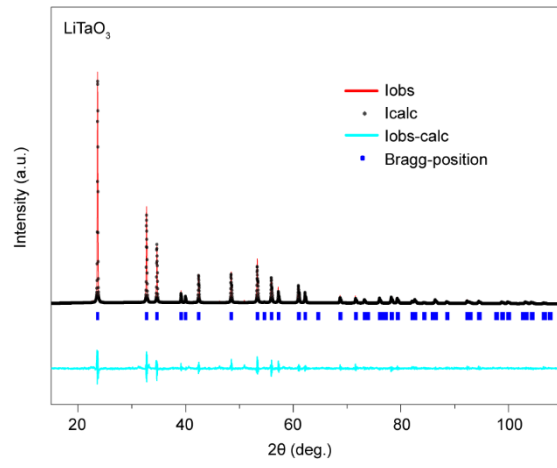

**Figure S2.** Rietveld refinement XRD patterns of  $\text{LiTaO}_3$

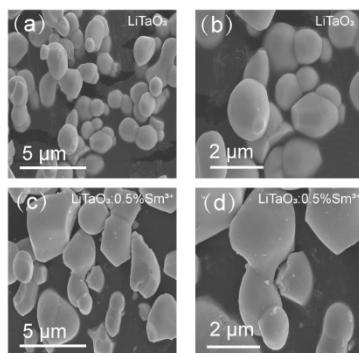

**Figure S3.** SEM images of LiTaO<sub>3</sub> under different scales: (a) 5 μm; (b) 2μm; SEM images of LiTaO<sub>3</sub>: Sm<sup>3+</sup> under different scales: (c) 5 μm; (d) 2μm.

**Table S1.** Rietveld refinement parameters of  $\text{LiTaO}_3: 0.5 \text{ mol\% Sm}^{3+}/ x \text{ mol\% Bi}^{3+}$  ( $x=0, 0.25, 0.5, 0.75, 1.25, 1.5$ ).

| Parameter           | $\text{LiTaO}_3:$<br>0.5 mol%<br>$\text{Sm}^{3+}$ | $\text{LiTaO}_3:$<br>0.5 mol%<br>$\text{Sm}^{3+}/$<br>0.25<br>mol%<br>$\text{Bi}^{3+}$ | $\text{LiTaO}_3:$<br>0.5 mol%<br>$\text{Sm}^{3+}/ 0.5$<br>mol%<br>$\text{Bi}^{3+}$ | $\text{LiTaO}_3:$<br>0.5 mol%<br>$\text{Sm}^{3+}/$<br>0.75<br>mol%<br>$\text{Bi}^{3+}$ | $\text{LiTaO}_3:$<br>0.5 mol%<br>$\text{Sm}^{3+}/$<br>1.25<br>mol%<br>$\text{Bi}^{3+}$ | $\text{LiTaO}_3:$<br>0.5 mol%<br>$\text{Sm}^{3+}/ 1.5$<br>mol%<br>$\text{Bi}^{3+}$ |
|---------------------|---------------------------------------------------|----------------------------------------------------------------------------------------|------------------------------------------------------------------------------------|----------------------------------------------------------------------------------------|----------------------------------------------------------------------------------------|------------------------------------------------------------------------------------|
| Space group         | R3c                                               | R3c                                                                                    | R3c                                                                                | R3c                                                                                    | R3c                                                                                    | R3c                                                                                |
| Z                   | 6                                                 | 6                                                                                      | 6                                                                                  | 6                                                                                      | 6                                                                                      | 6                                                                                  |
| a (Å)               | 5.158                                             | 5.158                                                                                  | 5.159                                                                              | 5.159                                                                                  | 5.161                                                                                  | 5.161                                                                              |
| b (Å)               | 5.158                                             | 5.158                                                                                  | 5.159                                                                              | 5.159                                                                                  | 5.161                                                                                  | 5.161                                                                              |
| c (Å)               | 13.763                                            | 13.763                                                                                 | 13.763                                                                             | 13.768                                                                                 | 13.764                                                                                 | 13.765                                                                             |
| V (Å <sup>3</sup> ) | 317.238                                           | 317.261                                                                                | 317.283                                                                            | 317.374                                                                                | 317.479                                                                                | 317.490                                                                            |
| R <sub>wp</sub> (%) | 8.75                                              | 9.16                                                                                   | 8.46                                                                               | 9.69                                                                                   | 10.02                                                                                  | 9.65                                                                               |
| R <sub>p</sub> (%)  | 5.96                                              | 7.21                                                                                   | 7.07                                                                               | 6.96                                                                                   | 7.32                                                                                   | 7.98                                                                               |
| $\chi^2$            | 1.978                                             | 2.361                                                                                  | 1.672                                                                              | 1.843                                                                                  | 2.043                                                                                  | 2.541                                                                              |

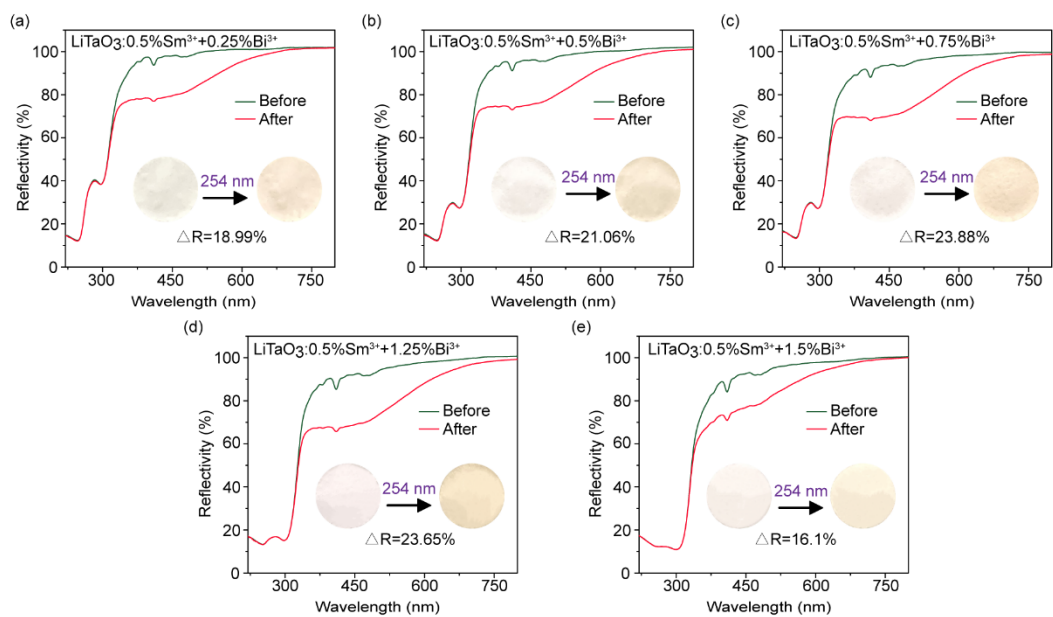

**Figure S4.** DRS and color change photos of  $\text{LiTaO}_3: 0.5 \text{ mol}\% \text{ Sm}^{3+}/ x \text{ mol}\% \text{ Bi}^{3+}$  powders before and after 254 nm light irradiation: **(a)**  $x=0.25$ ; **(b)**  $x=0.5$ ; **(c)**  $x=0.75$ ; **(d)**  $x=1.25$ ; **(e)**  $x=1.5$ .

**Table S2.** Coloring wavelength and time required for complete coloring of inorganic

Photochromism materials reported in recent years

| Material                                                                                     | coloring wavelength | Time  | Reference        |
|----------------------------------------------------------------------------------------------|---------------------|-------|------------------|
| $\text{LiNbO}_3:\text{Bi}^{3+}/\text{Pr}^{3+}$                                               | 365 nm              | 5 s   | [1]              |
| $\text{Na}_{0.5}\text{Bi}_{2.5}\text{Nb}_2\text{O}_9:\text{Ho}^{3+}$                         | 407 nm              | 5 s   | [2]              |
| $\text{Na}_{0.5}\text{Bi}_{4.5}\text{Ti}_4\text{O}_{15}:\text{Re}$ (Re = Sm, Pr, Er)         | 407 nm              | 5 s   | [3]              |
| $\text{YbNbO}_4/\text{ErNbO}_4$                                                              | 365 nm              | 10 s  | [4]              |
| $\text{YNbO}_4:\text{Er}^{3+}/\text{Tm}^{3+}/\text{Yb}^{3+}$                                 | 365 nm              | 15 s  | [5]              |
| $\text{K}_{0.5}\text{Na}_{0.5}\text{NbO}_3:\text{Eu}^{3+}$                                   | 420 nm              | ~20 s | [6]              |
| $\text{K}_{0.5}\text{Na}_{0.5}\text{NbO}_3:\text{Nd}^{3+}$                                   | 365 nm              | 20 s  | [7]              |
| $\text{LiTaO}_3:\text{Bi}^{3+}/\text{Sm}^{3+}$                                               | 254 nm              | 25 s  | <b>This work</b> |
| $\text{BaMgSiO}_4:\text{Eu}^{2+}$                                                            | 405 nm              | 30 s  | [8]              |
| $\text{PbWO}_4:\text{Yb}^{3+}, \text{Er}^{3+}$                                               | 532 nm              | 40 s  | [9]              |
| $\text{SrHfO}_3:\text{Ho}^{3+}$                                                              | 254 nm              | 60 s  | [10]             |
| $\text{Bi}_7\text{Ti}_4\text{NbO}_{21}:\text{Er}^{3+}$                                       | 405 nm              | 60 s  | [11]             |
| $\text{LiTaO}_3:\text{Bi}^{3+}/\text{Dy}^{3+}$                                               | 254 nm              | 60 s  | [12]             |
| $\text{BaMg}_{0.28}\text{Zr}_{0.16}\text{Ta}_{0.56}\text{O}_3:\text{Dy}^{3+}$                | 365 nm              | 2 min | [13]             |
| $\text{KSr}_2\text{Nb}_5\text{O}_{15}:\text{Sm}^{3+}$                                        | 365 nm              | 2 min | [14]             |
| $\text{Ba}(\text{Zr}_{0.16}\text{Mg}_{0.28}\text{Ta}_{0.56})\text{O}_3:0.05\%\text{Pr}^{3+}$ | 365 nm              | 2 min | [15]             |
| +                                                                                            | 254 nm              | 2 min | [16]             |
| $\text{NaYTiO}_4:\text{Bi}^{3+}/\text{Er}^{3+}$                                              | 254 nm              | 2 min | [17]             |

---

|                                                              |        |        |      |
|--------------------------------------------------------------|--------|--------|------|
| $\text{SrHfO}_3:\text{Er}^{3+}$                              | 280 nm | 2 min  | [18] |
| $\text{Ca}_2\text{SnO}_4:\text{Eu}^{3+}$                     | 254 nm | 16 min | [19] |
| $\text{CaWO}_4:\text{Yb}^{3+}/\text{Er}^{3+}/\text{Bi}^{3+}$ | 254 nm | 20 min | [20] |
| $\text{SrWO}_4:\text{Yb}^{3+}/\text{Er}^{3+}/\text{Bi}^{3+}$ |        |        |      |
| $\text{TiO}_2:\text{Yb}^{3+}/\text{Er}^{3+}$                 | 405 nm | 27 min | [21] |

---

**Table S3.** Reported inorganic photochromic materials that can be Photobleaching, bleaching wavelength, optical power density and bleaching time

| Material                                                                                           | Bleaching wavelength | Power                       | Time      | Reference        |
|----------------------------------------------------------------------------------------------------|----------------------|-----------------------------|-----------|------------------|
| LiTaO <sub>3</sub> : Bi <sup>3+</sup> /Sm <sup>3+</sup>                                            | 365 nm               | 40.8<br>mW/cm <sup>2</sup>  | ~1 s      | <b>This work</b> |
| CaWO <sub>4</sub> :Yb <sup>3+</sup> /Er <sup>3+</sup> /Bi <sup>3+</sup>                            | 473 nm               | 66.72<br>W/cm <sup>2</sup>  | 5 s       | [19]             |
| SrWO <sub>4</sub> :Yb <sup>3+</sup> /Er <sup>3+</sup> /Bi <sup>3+</sup>                            | 473 nm               | 186.84<br>W/cm <sup>2</sup> | 10 s      | [20]             |
| SrHfO <sub>3</sub> :Ho <sup>3+</sup>                                                               | 405 nm               | 800 mW                      | 1 min     | [10]             |
| LiTaO <sub>3</sub> :Bi <sup>3+</sup> /Dy <sup>3+</sup>                                             | 365 nm               | 384<br>μW/cm <sup>2</sup>   | 1min      | [12]             |
| LiNbO <sub>3</sub> :Bi <sup>3+</sup> /Pr <sup>3+</sup>                                             | 500 nm               | -                           | 2 min     | [1]              |
| BaMgSiO <sub>4</sub> :Eu <sup>2+</sup>                                                             | 532 nm               | 3.25<br>W/cm <sup>2</sup>   | 2 min     | [8]              |
| Ba(Zr <sub>0.16</sub> Mg <sub>0.28</sub> Ta <sub>0.56</sub> )O <sub>3</sub> :0.05%Pr <sup>3+</sup> | 450 nm               | 1 W/cm <sup>2</sup>         | 2 min     | [15]             |
| +                                                                                                  |                      |                             |           |                  |
| KSr <sub>2</sub> Nb <sub>5</sub> O <sub>15</sub> :Sm <sup>3+</sup>                                 | 532 nm               | 5 mW                        | >2<br>min | [14]             |
| BaMg <sub>0.28</sub> Zr <sub>0.16</sub> Ta <sub>0.56</sub> O <sub>3</sub> : Dy <sup>3+</sup>       | 450 nm               | 450 mW                      | >2<br>min | [13]             |



|                                                                                        |        |      |                        |      |
|----------------------------------------------------------------------------------------|--------|------|------------------------|------|
| TiO <sub>2</sub> :Yb <sup>3+</sup> /Er <sup>3+</sup>                                   | 808 nm | 3    | 170 s                  | [21] |
|                                                                                        |        |      | mW/cm <sup>2</sup>     |      |
| SrHfO <sub>3</sub> :Er <sup>3+</sup>                                                   | 405 nm | 5.1  | 4 min                  | [17] |
|                                                                                        |        |      | W/cm <sup>2</sup>      |      |
| ErNbO <sub>4</sub>                                                                     | 405 nm | 1.03 | 5 min                  | [4]  |
|                                                                                        |        |      | W/cm <sup>2</sup>      |      |
| Ca <sub>2</sub> SnO <sub>4</sub> :Eu <sup>3+</sup>                                     | 585 nm | 2    | 5 min                  | [18] |
|                                                                                        |        |      | mW/cm <sup>2</sup>     |      |
| Sr <sub>2</sub> SnO <sub>4</sub> :Yb <sup>3+</sup> /Ho <sup>3+</sup>                   | 480 nm | -    | >8                     | [22] |
|                                                                                        |        |      | min                    |      |
| BaMgSiO <sub>4</sub> :M (M=Ce <sup>3+</sup> , Mn <sup>2+</sup> , or Nd <sup>3+</sup> ) | 590 nm | 1.6  | 9 min                  | [23] |
|                                                                                        |        |      | W/cm <sup>2</sup>      |      |
| YNbO <sub>4</sub> :Er <sup>3+</sup> /Tm <sup>3+</sup> /Yb <sup>3+</sup>                | 405 nm | 1.03 | 10                     | [5]  |
|                                                                                        |        |      | W/cm <sup>2</sup> min  |      |
| Bi <sub>7</sub> Ti <sub>4</sub> NbO <sub>21</sub> :Er <sup>3+</sup>                    | 532 nm | 12   | 10                     | [11] |
|                                                                                        |        |      | mW/cm <sup>2</sup> min |      |
| NaYTiO <sub>4</sub> :Bi <sup>3+</sup> /Er <sup>3+</sup>                                | 450 nm | -    | 10                     | [16] |
|                                                                                        |        |      | min                    |      |
| Ca <sub>2</sub> SnO <sub>4</sub> : Sm <sup>3+</sup>                                    | 520 nm | -    | >10                    | [24] |
|                                                                                        |        |      | min                    |      |

---

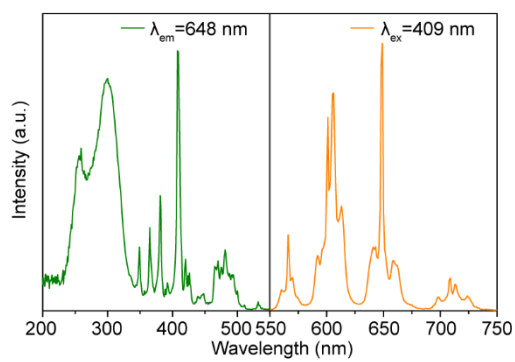

**Figure S5.** Excitation and emission spectra of  $\text{LiTaO}_3$ : 0.5 mol%  $\text{Sm}^{3+}$ / 1 mol%  $\text{Bi}^{3+}$

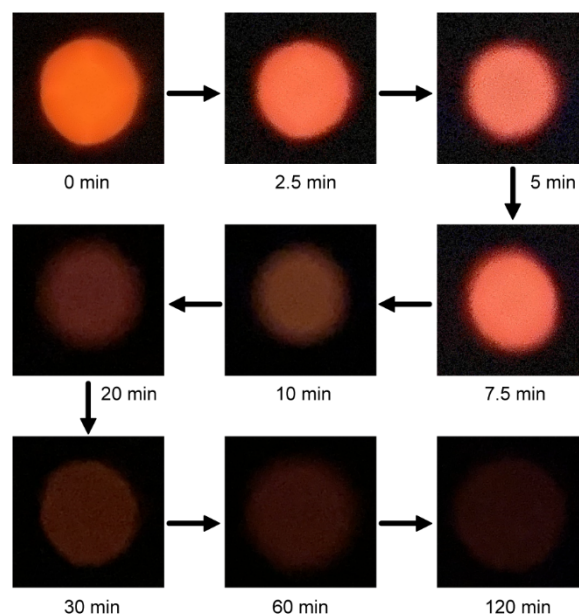

**Figure S6.** After irradiation of LiTaO<sub>3</sub>: 0.5 mol% Sm<sup>3+</sup>/ 1 mol% Bi<sup>3+</sup> with 254 nm light for 30 s, photos of afterglow at different times in a dark environment.

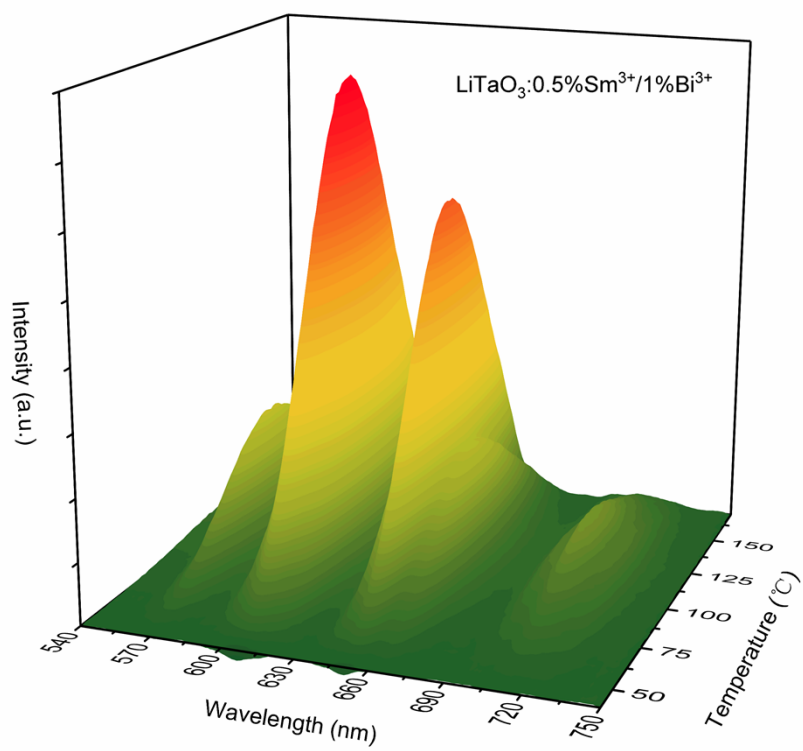

**Figure S7.** Emission spectra of the  $\text{LiTaO}_3: 0.5 \text{ mol}\% \text{ Sm}^{3+}/ 1 \text{ mol}\% \text{ Bi}^{3+}$  sample samples during TL measurements.

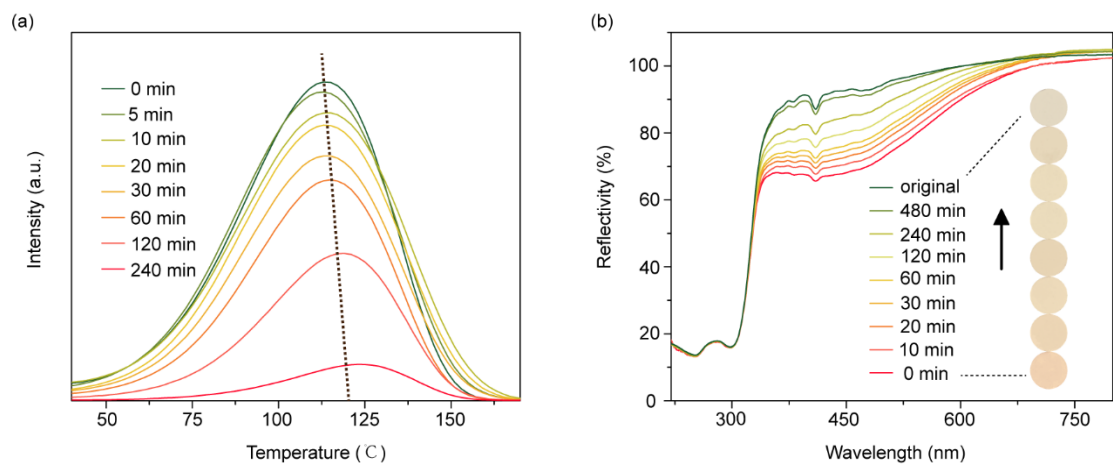

**Figure S8.** (a) TL spectra of LiTaO<sub>3</sub>: 0.5 mol% Sm<sup>3+</sup>/ 1 mol% Bi<sup>3+</sup> after irradiation at 254 nm for 30 s with different delay times; (b) DRS of LiTaO<sub>3</sub>: 0.5 mol% Sm<sup>3+</sup>/ 1 mol% Bi<sup>3+</sup> after irradiation at 254 nm for 30 s with different delay times. Insets: Sample photos at corresponding delay time.

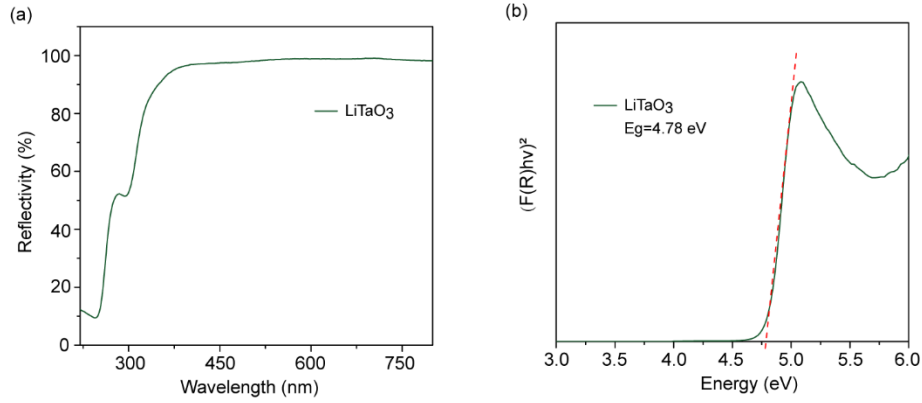

**Figure S9. (a)** DRS of LiTaO<sub>3</sub>; **(b)** The relationship between the photon energy and the absorption coefficient of LiTaO<sub>3</sub>.

The band gap ( $E_g$ ) in LiTaO<sub>3</sub> was calculated by the following formula [25]:  $(\alpha h\nu)^2 = A(h\nu - E_g)$ , where  $h$  is the Planck constant,  $\nu$  is the light frequency,  $A$  is the absorption constant, and  $\alpha$  is the absorption coefficient that is proportional to  $F(R)$ .

According to the Kubelka-Munk formula [26], its expression is  $F(R) = \frac{(1 - R)^2}{2R}$ ,

where  $R$  is the reflectivity of the material. Plot  $h\nu$  (photon energy) with  $[F(R)h\nu]^2$  values, as shown in **Figure S5(b)**. By making a tangent to the resulting curve, the intercept between the tangent and the abscissa is  $E_g$ .

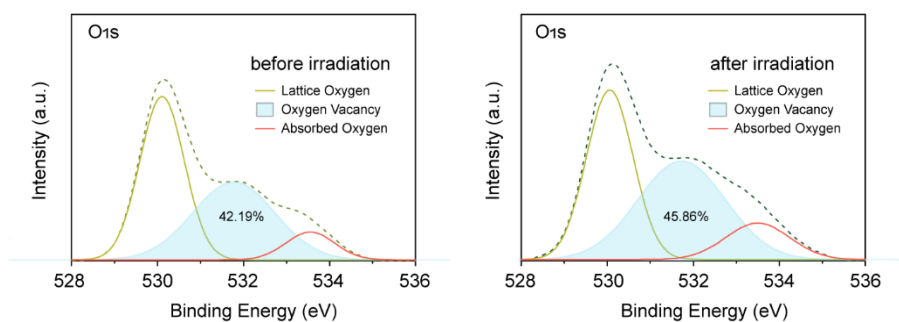

**Figure S10.** XPS spectra of LiTaO<sub>3</sub>: 0.5 mol% Sm<sup>3+</sup>/ 1 mol% Bi<sup>3+</sup> in O<sub>1s</sub> orbit before and after 254 nm light irradiation for 30 s.

## References

1. L. Sun, B. Wang, G. Xing, C. Liang, W. Ma and S. Yang, Bi-induced photochromism and photo-stimulated luminescence with fast photochromic response for multi-mode dynamic anti-counterfeiting and optical information storage, *Chem. Eng. J.*, 2023, **455**, 140752.
2. Q. Zhang, J. Liu, H. Sun, X. Wang, X. Hao and S. An, Luminescence photoswitching of Ho-doped  $\text{Na}_{0.5}\text{Bi}_{2.5}\text{Nb}_2\text{O}_9$  ferroelectrics: the luminescence readout process, *J. Mater. Chem. C.*, 2017, **5**, 807-816.
3. Q. Zhang, Y. Zhang, H. Sun, W. Geng, X. Wang, X. Hao and S. An, Tunable luminescence contrast of  $\text{Na}_{0.5}\text{Bi}_{4.5}\text{Ti}_4\text{O}_{15}:\text{Re}$  (Re = Sm, Pr, Er) photochromics by controlling the excitation energy of luminescent centers, *ACS Appl. Mater. Interfaces.*, 2016, **8**, 34581-34589.
4. Z. Zhang, L. Guo, H. Sun, D. Peng, H. Zou, N. Sun, Q. Zhang and X. Hao, Rare earth orthoniobate photochromics with self-activated upconversion emissions for high-performance optical storage applications, *J. Mater. Chem. C.*, 2021, **9**, 13841-13850.
5. Z. Zhang, P. Li, Z. Xu, Z. Zhang, Q. Zhang, H. Sun and X. Hao, Multicolor upconversion reversible modulations in  $\text{YNbO}_4:\text{Er}^{3+}/\text{Tm}^{3+}/\text{Yb}^{3+}$  photochromic materials, *J. Rare. Earth.*, 2022.
6. Z. Yang, J. Du, L. I. D. J. Martin, D. V. d. Heggen and D. Poelman, Highly responsive photochromic ceramics for high-contrast rewritable information



- displays, *Laser. photonics. Rev.*, 2021, **15**, 2000525.
7. H. Wang, J. Lin, B. Deng, T. Lin, C. Lin, Y. Cheng, X. Wu, X. Zheng and X. Yu, Reversible multi-mode modulations of optical behavior in photochromic-translucent Nd-doped  $K_{0.5}Na_{0.5}NbO_3$  ceramics, *J. Mater. Chem. C.*, 2020, **8**, 2343-2352.
  8. Y. Zhu, H. Sun, Q. Jia, L. Guan, D. Peng, Q. Zhang and X. Hao, Site-selective occupancy of  $Eu^{2+}$  toward high luminescence switching contrast in  $BaMgSiO_4$ -based photochromic materials, *Adv. Optical. Mater.*, 2021, **9**, 2001626.
  9. X. Bai, Z. Yang, Y. Zhan, Z. Hu, Y. Ren, M. Li, Z. Xu, A. Ullah, I. Khan, J. Qiu, Z. Song, B. Liu and Y. Wang, Novel strategy for designing photochromic ceramic: reversible upconversion luminescence modification and optical information storage application in the  $PbWO_4:Yb^{3+}, Er^{3+}$  photochromic ceramic, *ACS Appl. Mater. Interfaces.*, 2020, **12**, 21936-21943.
  10. R. Zhang, Y. Jin, C. Wang, H. Wu, L. Chen and Y. Hu, A photochromic material-based platform for high-precision UV light detection and erasable optical information storage, *J. Alloy. Compd.*, 2023, **934**, 167918.
  11. L. Shen, T. Wei, Y. Shi, X. Wang, L. Wu, J. Cui, T. Zhang, H. Yu and Z. Li, Light-heat and light-light dual-controlled upconversion luminescence and photochromic processes in Er-activated  $Bi_7Ti_4NbO_{21}$  for Optical Information Storage, *ACS Appl. Electrton. Mater.*, 2022, **4**, 776-786.
  12. T. Lyu, P. Dorenbos, C. Li and Z. Wei, Wide range X-ray to infrared photon detection and energy storage in  $LiTaO_3:Bi^{3+}, Dy^{3+}$  perovskite, *Laser. Photonics.*

- Rev.*, 2022, **16**, 2200055.
13. C. Zuo, W. Tang, C. Ma, C. Chang, K. Fan, Y. Li, X. Yuan, Z. Wen and Y. Cao, BaMg<sub>0.28</sub>Zr<sub>0.16</sub>Ta<sub>0.56</sub>O<sub>3</sub>: Dy<sup>3+</sup> an reversible inorganic photochromic material with large photochromic efficiency and high luminescence modulation, *J. Lumin.*, 2023, **255**, 119585.
  14. S. Cao, Q. Wang, W. Wang, G. Hao, J. Xu, Q. Zhang and F. Gao, A novel modification strategy for photochromic KSr<sub>2</sub>Nb<sub>5</sub>O<sub>15</sub>-based ceramics by establishing a heterojunction band structure, *Ceram. Int.*, 2023, **49**, 8398-8408.
  15. W. Tang, C. Zuo, C. Ma, Y. Wang, Y. Li, X. Yuan, E. Wang, Z. Wen and Y. Cao, Designing photochromic materials with high photochromic contrast and large luminescence modulation for hand-rewritable information displays and dual-mode optical storage, *Chem. Eng. J.*, 2022, **435**, 134670.
  16. Y. Wang, X. Yuan, Y. Cao and C. Ma, Multiple anti-counterfeiting strategy by integrating up-conversion, down-shifting luminescence, phosphorescence and photochromism into NaYTiO<sub>4</sub> : Bi/Er phosphors, *J. Mater. Sci. Technol.*, 2022, **130**, 219-226.
  17. R. Zhang, Y. Jin, L. Yuan, K. Deng, C. Wang, G. Xiong, L. Chen and Y. Hu, Inorganic photochromism material SrHfO<sub>3</sub>:Er<sup>3+</sup> integrating multiple optical behaviors for multimodal anti-counterfeiting, *J. Alloy. Compd.*, 2022, **921**, 166081.
  18. Z. Yang, J. Hu, L. I. D. J. Martin, D. V. d. Heggen and D. Poelman, Realizing nondestructive luminescence readout in photochromic ceramics via deep ultraviolet excitation for optical information storage, *J. Mater. Chem. C.*, 2021, **9**, 14012-

14020.

19. X. Bai, Y. Cun, Z. Xu, Y. Zi, A. A. Haider, A. Ullah, I. Khan, J. Qiu, Z. Song and Z. Yang, Multiple Anti-Counterfeiting and optical storage of reversible dual-mode luminescence modification in photochromic  $\text{CaWO}_4$ :  $\text{Yb}^{3+}$ ,  $\text{Er}^{3+}$ ,  $\text{Bi}^{3+}$  phosphor, *Chem. Eng. J.*, 2022, **429**, 132333.
20. X. Bai, Z. Yang, Z. Xu, Y. Cun, Y. Zi, H. Zhao, Y. Song, Y. He, A. A. Haider, J. Qiu, Z. Song, A. Huang, C. Tatiana and Z. Yang, Optical memory and anti-counterfeiting application based on luminescence reversible modification and color contrast of photochromic phosphor, *Sci. China. Mater.*, 2023.
21. A. A. Haider, Y. Cun, X. Bai, Y. Zi, J. Qiu, Z. Song, A. Huang and Z. Yang, Anti-counterfeiting applications by photochromism induced modulation of reversible upconversion luminescence in  $\text{TiO}_2$ : $\text{Yb}^{3+}$ ,  $\text{Er}^{3+}$  ceramic, *J. Mater. Chem. C.*, 2022, **10**, 6243-6251.
22. Y. Mu, P. Du, W. Li and L. Luo, A photochromism induced dual-mode luminescence modulation in  $\text{Sr}_2\text{SnO}_4$ : $\text{xYb}^{3+}/\text{Ho}^{3+}$  ceramics, *Ceram. Int.*, 2021, **47**, 25037-25044.
23. Z. Yang, J. Du, L. I. D. J. Martin, A. Feng, E. Cosaert, B. Zhao, W. Liu, R. V. Deun, H. Vrielinck and D. Poelman, Designing photochromic materials with large luminescence modulation and strong photochromic efficiency for dual-Mode rewritable optical storage, *Adv. Optical. Mater.*, 2021, **9**, 2100669.
24. G. Krieke, A. Antuzevics, K. Smits and D. Millers, Enhancement of persistent luminescence in  $\text{Ca}_2\text{SnO}_4$ :  $\text{Sm}^{3+}$ , *Opt. Mater.*, 2021, **113**, 110842.

25. J. Tauc, Optical properties and electronic structure of amorphous Ge and Si, *Mater. Res. Bull.*, 1968, **3**, 37-46.
26. L. Yang and B. Kruse, Revised Kubelka–Munk theory. I. Theory and application, *J. Opt. Soc. Am. A.*, 2004, **21**, 1933.
